# Supplementary material for: Circulating anti-citrullinated peptide antibodies, cytokines and genotype as biomarkers of response to disease-modifying antirheumatic drug therapy in early rheumatoid arthritis
Source: Springer Nature journal article supplement (doi:10.1186/s12891-015-0587-1), 2015-05-28
Supplement: MOESM1 [file 9752386]

**Additional File****Table S1: SDAI (Simplified disease activity index) base line disease activity**

| <b>Category</b>        | <b>n</b> | <b>Median</b> | <b>IQR</b> |
|------------------------|----------|---------------|------------|
| Mild $\leq 11$         | 3        | 5.73          | 5.01       |
| Moderate $>11 \leq 26$ | 25       | 20.00         | 8.52       |
| High $>26$             | 112      | 45.31         | 19.47      |

**Table S2: changes in SDAI and circulating biomarker concentrations following 6 months of synthetic DMARD therapy.**

| <b>Variable</b> | <b>n</b> | <b>median</b> | <b>min</b> | <b>max</b> | <b>iqr</b> | <b>p value</b> |
|-----------------|----------|---------------|------------|------------|------------|----------------|
| SDAI b*         | 140      | 41.39         | 5.28       | 77         | 23.67      |                |
| SDAI 6**        | 140      | 16            | 0.1        | 69.77      | 15.805     | 0.0001         |
| CRP b           | 140      | 17.1          | 1          | 303        | 42.25      |                |
| CRP 6           | 140      | 8.9           | 1          | 83.9       | 17.35      | 0.0001         |
| ACPA b          | 100      | 516.6         | 1.9        | 2526.8     | 1027.75    |                |
| ACPA 6          | 100      | 255.65        | 1.1        | 1420.3     | 677.2      | 0.0001         |
| IL-1 $\beta$ b  | 51       | 6.23          | 0.12       | 191.32     | 13.69      |                |
| IL-1 $\beta$ 6  | 51       | 3.8           | 0.35       | 199.74     | 18.17      | NS             |
| IL-1Ra b        | 123      | 80.06         | 0          | 5012.27    | 288.51     |                |
| IL-1Ra 6        | 123      | 80.54         | 0          | 12084.64   | 427.81     | NS             |
| IL-2 b          | 32       | 0             | 0          | 216.91     | 7.41       |                |
| IL-2 6          | 32       | 0             | 0          | 267.6      | 13.88      | NS             |
| IL-4 b          | 32       | 4.7           | 0          | 904.79     | 10.28      |                |
| IL-4 6          | 32       | 1.42          | 0          | 62.61      | 5.31       | 0.0075         |
| IL-6 b          | 123      | 24.35         | 0          | 791.93     | 67.93      |                |
| IL-6 6          | 123      | 14.23         | 0          | 778.82     | 51.89      | NS             |
| IL-7 b          | 123      | 20.32         | 0          | 6825.1     | 82.22      |                |
| IL-7 6          | 123      | 16.69         | 0          | 3596       | 23.46      | 0.0013         |
| IL-8 b          | 123      | 8.79          | 0          | 36698.94   | 12.65      |                |
| IL-8 6          | 123      | 5.7           | 0          | 1618.59    | 7.09       | 0.0001         |
| IL-10 b         | 32       | 11.435        | 0          | 1172.06    | 29.09      |                |
| IL-10 6         | 32       | 8.145         | 1.8        | 1111       | 21.71      | NS             |
| IL-12 b         | 123      | 11.93         | 0.63       | 3557.84    | 64.8       |                |
| IL-12 6         | 123      | 17.75         | 0.41       | 8144.25    | 74.79      | NS             |

|                       |     |           |           |           |           |        |
|-----------------------|-----|-----------|-----------|-----------|-----------|--------|
| IL-17 b               | 32  | 0         | 0         | 23.9      | 0         |        |
| IL-17 6               | 32  | 0         | 0         | 13.87     | 0         | NS     |
| G-CSF b               | 123 | 13.82     | 0         | 4817.44   | 60.02     |        |
| G-CSF 6               | 123 | 7.23      | 0         | 1328.97   | 51.61     | 0.0083 |
| GM-CSF b              | 123 | 1.08      | 0         | 1458.59   | 44.37     |        |
| GM-CSF 6              | 123 | 0         | 0         | 2571.87   | 82.37     | NS     |
| IFN $\gamma$ b        | 123 | 42.64     | 0         | 11151.66  | 264.72    |        |
| IFN $\gamma$ 6        | 123 | 27.19     | 0         | 6394.31   | 444.72    | NS     |
| TNF b                 | 123 | 11.67     | 0.55      | 2951.68   | 69.55     |        |
| TNF 6                 | 123 | 12.15     | 1.33      | 3107.1    | 93.82     | NS     |
| VEGF b                | 123 | 168.56    | 0         | 4503.15   | 441.33    |        |
| VEGF 6                | 123 | 92.62     | 0         | 5007.35   | 167.21    | 0.001  |
| CCL-2 b               | 32  | 10.65     | 0         | 521.48    | 100.955   |        |
| CCL-2 6               | 32  | 50.65     | 0         | 566.52    | 81.59     | NS     |
| CCL-4 b               | 32  | 100.905   | 26.67     | 344.72    | 91.10001  |        |
| CCL-4 6               | 32  | 96.275    | 27.26     | 326.37    | 62.46     | NS     |
| IL-1/IL1-ra b         | 37  | 0.050012  | 0.0057609 | 0.9042904 | 0.0487324 |        |
| IL-1/IL-1ra 6         | 37  | 0.0282269 | 0.0029457 | 0.4552684 | 0.0622231 | 0.013  |
| IL-17/IL-10 b         | 30  | 10.41581  | 0.3762998 | 118.3059  | 15.60833  |        |
| IL-17/ IL-10 6        | 30  | 3.723691  | 0.6393507 | 22.96679  | 5.373202  | 0.0001 |
| IFN $\gamma$ / IL-4 b | 24  | 25.17977  | 0         | 179.2     | 28.12688  |        |
| IFN $\gamma$ / IL-4 6 | 24  | 21.07841  | 1.105882  | 83.55289  | 33.04997  | NS     |
| IL-8/ IL-10 b         | 30  | 0.8005226 | 0.0097521 | 45.19495  | 2.059342  |        |
| IL-8/ IL-10 6         | 30  | 0.796825  | 0.0068947 | 27.28358  | 1.268058  | NS     |
| IL-6/ IL-10 b         | 30  | 1.046355  | 0         | 33.66154  | 2.474186  |        |
| IL-6/ IL-10 6         | 30  | 1.834637  | 0         | 37.93333  | 6.346017  | NS     |

\*b – baseline \*6 – 6 months \*NS – not significant

SDAI, Simplified disease activity index; CRP, C-reactive protein; ACPA, Anti-cyclic citrullinated peptide antibodies; IL-, Interleukin; G-CSF, Granulocyte colony-stimulating factor; GM-CSF, Granulocyte and macrophage colony-stimulating factor; IFN, Interferon; TNF, Tumour necrosis factor; VEGF, Vascular endothelial growth factor; CCL-, Chemokine (C-C motif) ligand-.

**Table S3: SDAI (Simplified disease activity index) response at 6 months**

| <b>Response</b>              | <b>n</b> |
|------------------------------|----------|
| < 50% (no response)          | 58       |
| ≥50%<70% (minor response)    | 40       |
| ≥70%<85% (moderate response) | 22       |
| ≥ 85% (major response)       | 20       |

**Table S4: SDAI (Simplified disease activity index) response at 6 months treatment sub-groups**

| <b>Response</b>              | <b>n<br/>(Methotrexate<br/>plus prednisone)</b> | <b>n<br/>(Methotrexate<br/>only)</b> |
|------------------------------|-------------------------------------------------|--------------------------------------|
| < 50% (no response)          | 14                                              | 16                                   |
| ≥50%<70% (minor response)    | 12                                              | 14                                   |
| ≥70%<85% (moderate response) | 4                                               | 8                                    |
| ≥ 85% (major response)       | 3                                               | 5                                    |

**Table S5: SDAI (Simplified disease activity index) response at 6 months risk allele sub-groups**

| <b>Response</b>              | <b>n<br/>(risk allele<br/>positive)</b> | <b>n<br/>(risk allele<br/>negative)</b> |
|------------------------------|-----------------------------------------|-----------------------------------------|
| < 50% (no response)          | 27                                      | 21                                      |
| ≥50%<70% (minor response)    | 21                                      | 13                                      |
| ≥70%<85% (moderate response) | 11                                      | 6                                       |
| ≥ 85% (major response)       | 9                                       | 7                                       |
